# Supplementary material for: Bioresource-based blends of poly(3-hydroxybutyrate-co-4-hydroxybutyrate) and stereocomplex polylactide with improved rheological and mechanical properties and enzymatic hydrolysis
Source: Royal Society of Chemistry journal article supplement (doi:10.1039/c4ta01194e), 2014-01-01
Supplement: c4ta01194e1.pdf [file c4ta01194e1.pdf]

**Electronic supplementary materials for reviewing**

**Fig.S1.** the photograph of the samples after impact tests.

**Fig.S2.** DSC curves for the blends with different mixing time after addition of PDLA: (a) 5 min and (b) 10 min.

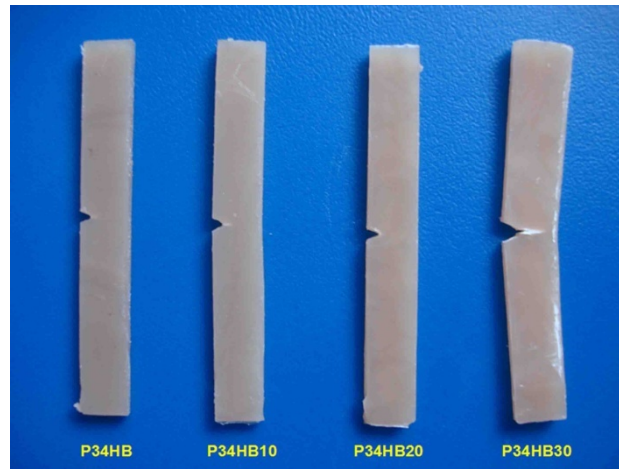

**Fig.S1.** The photograph of the samples after impact tests.

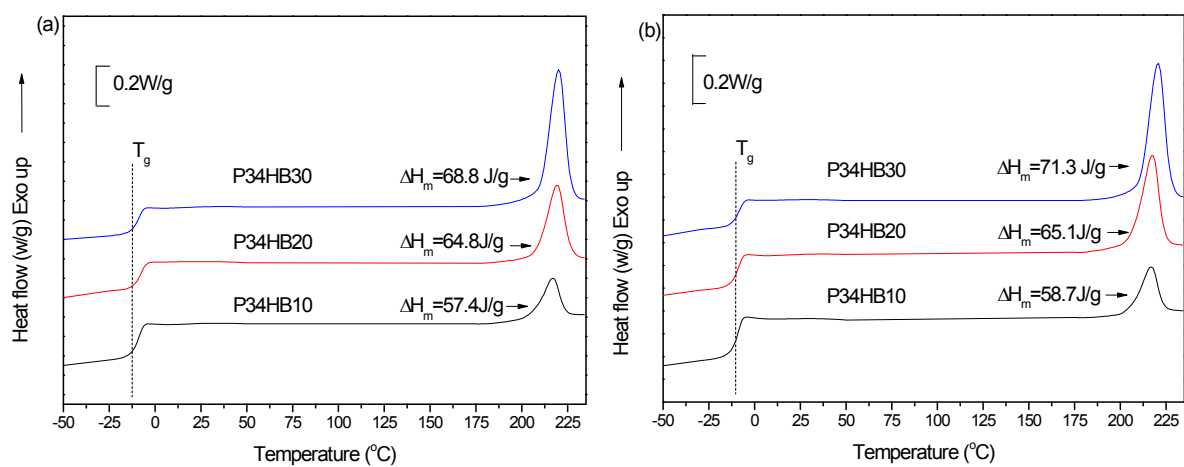

**Fig.S2.** DSC curves for the blends with different mixing time after addition of PDLA: (a) 5 min and (b) 10 min.
